# Supplementary material
Source: PubMed Central journal article supplement (PMC6065170)
Supplement: supp_RA118.002062_135507_2_supp_148001_p9nzq6.pdf [file supp_RA118.002062_135507_2_supp_148001_p9nzq6.pdf]

*(3aR,5R,6aS)-5-(2-(Trifluoromethyl)phenyl)octahydrocyclopenta[c]pyrrole Hydrochloride (1)*: Compound **1** was synthesized in eight steps from (3aR,7aS)-3a,4,7,7a-tetrahydro-1H-isoindole-1,3(2H)-dione as described for compound **26** in our previous publication (1)

*6-Methyl-2-((3aR,5r,6aS)-5-(2-(trifluoromethyl)phenyl)hexahydrocyclopenta[c]pyrrol-2(1H)-yl)pyrimidine-4-carboxylic Acid (3)*: Step A: To a solution of (3aR,5R,6aS)-5-(2-(trifluoromethyl)phenyl)octahydrocyclopenta[c]pyrrole hydrochloride (**1**, 1.0 g, 3.43 mmol) and Et<sub>3</sub>N (1.43 mL, 10.29 mmol) in DMF (50 mL) was added methyl 2-chloropyrimidine-4-carboxylate (0.641 g, 3.43 mmol), and the resulting mixture stirred at 60 °C for 16 h. The mixture was allowed to cool to room temperature and was diluted with H<sub>2</sub>O (200 mL). The resulting aqueous mixture was extracted with EtOAc (3 × 100 mL), and the combined organic extracts were washed with H<sub>2</sub>O (3 × 100 mL), brine (100 mL), dried over Na<sub>2</sub>SO<sub>4</sub>, filtered, and concentrated under reduced pressure. The resulting residue was chromatographed over silica gel (0% to 30% EtOAc in hexanes) to give methyl 6-methyl-2-((3aR,5R,6aS)-5-(2-(trifluoromethyl)phenyl)hexahydrocyclopenta[c]pyrrol-2(1H)-yl)pyrimidine-4-carboxylate (**2**) as an off-white solid (1.20 g, 86%): <sup>1</sup>H NMR (300 MHz, CDCl<sub>3</sub>) δ 7.61 (m, 1H), 7.58 (m, 2H), 7.23 (m, 1H), 7.05 (s, 1H), 3.95 (s, 3H), 3.82 (m, 4H), 3.59 (m, 1H), 2.92 (m, 2H), 2.44 (s, 3H), 2.40 (m, 2H), 1.69 (m, 2H); MS (ESI+) *m/z* 406 [M + H]<sup>+</sup>.

Step B: To a solution of 6-methyl-2-((3aR,5R,6aS)-5-(2-(trifluoromethyl)phenyl)hexahydrocyclopenta[c]pyrrol-2(1H)-yl)pyrimidine-4-carboxylate (**2**, 1.2 g, 2.95 mmol) in a 1:1 mixture of CH<sub>3</sub>OH:THF (40 mL) was added aqueous 2 N NaOH solution (20 mL), and the resulting mixture stirred at room temperature for 16 h. The mixture was carefully neutralized at 0 °C to pH = 7 via slow addition of an aqueous 2 N HCl solution. The resulting aqueous mixture was extracted with CH<sub>2</sub>Cl<sub>2</sub> (3 × 100 mL), and the combined organic extracts were washed with brine (100 mL), dried over Na<sub>2</sub>SO<sub>4</sub>, filtered, and concentrated under reduced pressure. The resulting residue was chromatographed over silica gel (0% to 10% CH<sub>3</sub>OH in CH<sub>2</sub>Cl<sub>2</sub>) to give 6-methyl-2-((3aR,5r,6aS)-5-(2-(trifluoromethyl)phenyl)hexahydrocyclopenta[c]pyrrol-2(1H)-yl)pyrimidine-4-carboxylic acid (**3**) as a light-yellow solid (1.0 g, 86%): melting point = 129–131 °C; <sup>1</sup>H NMR (300 MHz, DMSO-*d*<sub>6</sub>) δ 13.30 (bs, 1H), 7.71–7.58 (m, 3H), 7.40 (m, 1H), 7.01 (s, 1H), 3.73–3.61 (m, 4H), 3.35 (m, 1H), 2.87 (m, 2H), 2.37 (s, 3H), 2.24 (m, 2H), 1.66 (m, 2H); MS (ESI+) *m/z* 392 [M + H]<sup>+</sup>; HPLC >99% purity (AUC), *t*<sub>R</sub> = 18.49 min (Method A); combustion analysis (%CHN): calculated for C<sub>20</sub>H<sub>20</sub>F<sub>3</sub>N<sub>3</sub>O<sub>2</sub>•0.25H<sub>2</sub>O: %C = 60.68; %H = 5.22; %N = 10.46; found: %C = 60.66; %H = 4.95; %N = 10.46.

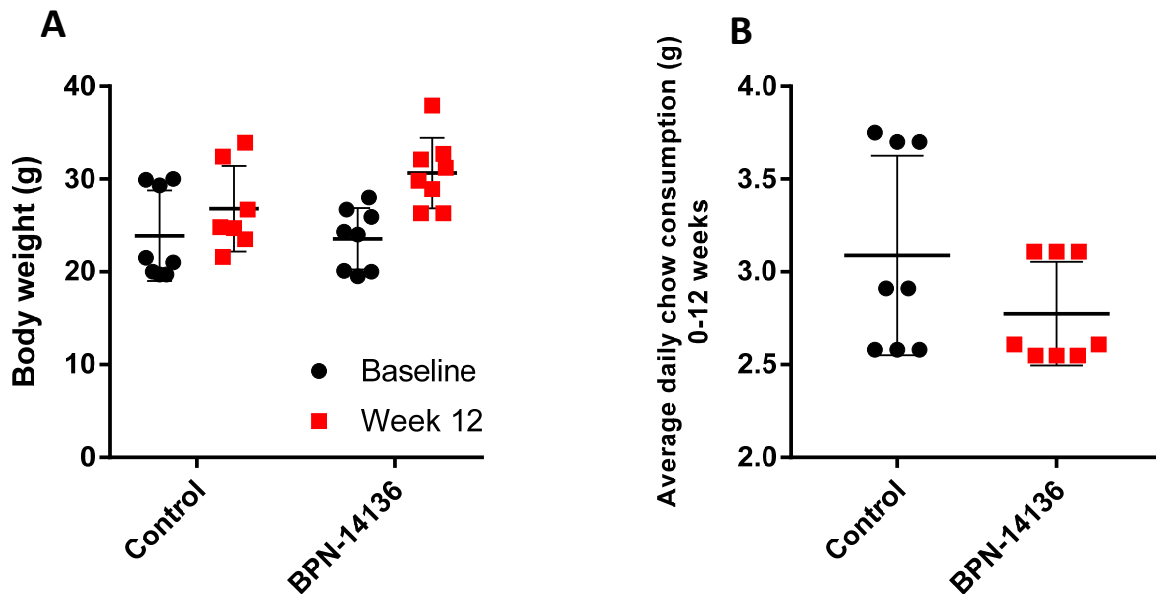

**Supplementary Figure S1. Chronic BPN-14136 administration in *Abca4*<sup>-/-</sup> mice does not reduce body weight and chow consumption.** (A), Body weight at baseline and at the end of the 12-week dosing period in vehicle-treated *Abca4*<sup>-/-</sup> mice (control) in comparison to the BPN-14136-treated *Abca4*<sup>-/-</sup> animals (BPN-14136). (B), Average daily chow consumption over the 12-week treatment period in vehicle-treated *Abca4*<sup>-/-</sup> mice (control) and in the BPN-14136-treated *Abca4*<sup>-/-</sup> animals (BPN-14136). At week 12, the mean body weight was not significantly different in the compound-treated and control groups (unpaired parametric t-test, P=0.0997). Chow consumption was not significantly different in the treated and control groups (unpaired parametric t-test, P=0.165). No weight loss or statistically significant reduction in chow consumption in the compound-treated animals in comparison to the control group is consistent with the lack of systemic toxicity for BPN-14136.

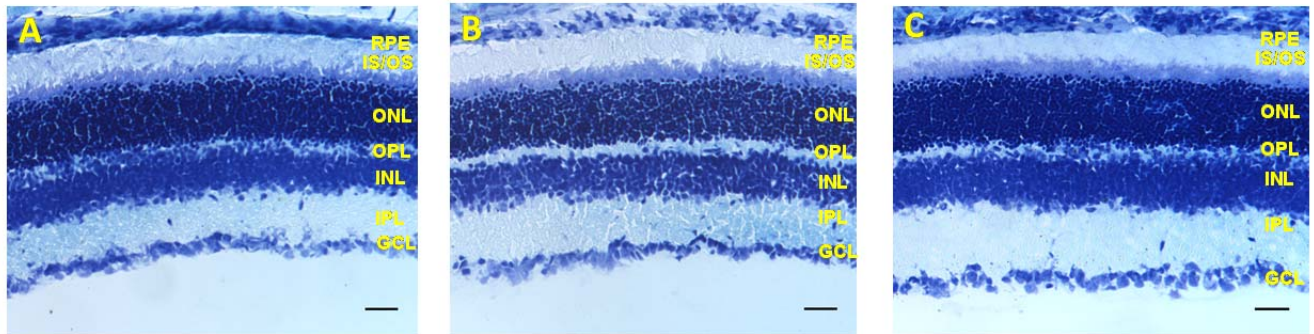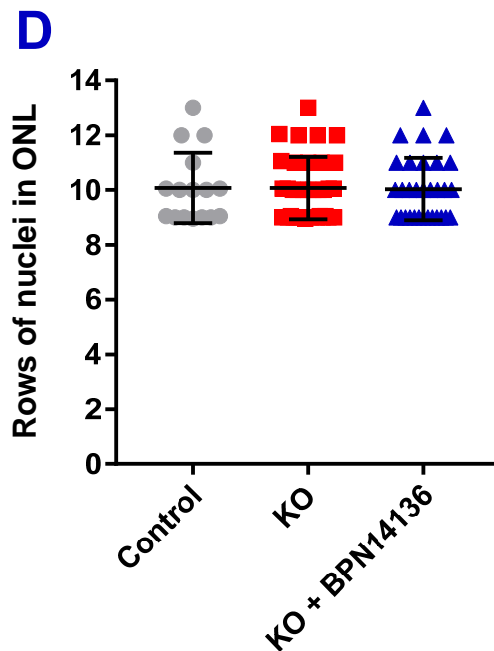

**Supplementary Figure S2. Analysis of RPE and retina cryosections by light microscopy.** Toluidine blue staining of the representative retinas sections from wild type mice (A) and vehicle-treated *Abca4*<sup>-/-</sup> mice (B) in comparison to the BPN-14136-treated *Abca4*<sup>-/-</sup> animals (C). No aberrant morphology was revealed in the retina after 12 weeks of BPN-14136 administration at the 20 mg/kg dose. Scale bar: 25  $\mu$ m. (D), Quantification of nuclei spanning the width of the outer nuclear layer (ONL). The number of photoreceptor nuclei in the ONL was counted in central mouse retina from wild type animals (3 eyes; 16 sections), vehicle-treated *Abca4*<sup>-/-</sup> mice (3 eyes; 17 sections), and BPN-14136-treated *Abca4*<sup>-/-</sup> animals (3 eyes; 17 sections). Consistent with the retinal safety of BPN-14136, no statistically significant difference between the three treatment groups was found (one-way ANOVA with Holm-Sidak *post-hoc* test analysis,  $P=0.9997$ ,  $\alpha = 0.05$ ).

**Supplementary Table S1.** BPN-14136 plasma levels following a single oral 5 mg/kg dose administration

| Animal ID | Time (hr) | Plasma Conc., ng/ml |       | SD              |
|-----------|-----------|---------------------|-------|-----------------|
|           |           | Individual          | Mean  |                 |
| 16        | 0.083     | 6020                |       |                 |
| 17        | 0.083     | 6880                |       |                 |
| 18        | 0.083     | 2900                | 5267  | 2094            |
| 19        | 0.25      | 10180               |       |                 |
| 20        | 0.25      | 8000                |       |                 |
| 21        | 0.25      | 13320               | 10500 | 2674            |
| 22        | 0.5       | 11360               |       |                 |
| 23        | 0.5       | 9860                |       |                 |
| 24        | 0.5       | 8440                | 9887  | 1460            |
| 16        | 1         | 7360                |       |                 |
| 17        | 1         | 9160                |       |                 |
| 18        | 1         | 6800                | 7773  | 1233            |
| 25        | 2         | 11960               |       |                 |
| 26        | 2         | 9400                |       |                 |
| 27        | 2         | 11720               | 11027 | 1414            |
| 19        | 4         | 11700               |       |                 |
| 20        | 4         | 7320                |       |                 |
| 21        | 4         | 7460                | 8827  | 2489            |
| 22        | 8         | 7540                |       |                 |
| 23        | 8         | 6320                |       |                 |
| 24        | 8         | 4720                | 6193  | 1414            |
| 25        | 12        | 4300                |       |                 |
| 26        | 12        | 6980                |       |                 |
| 27        | 12        | 4700                | 5327  | 1446            |
| 28        | 24        | 340                 |       |                 |
| 29        | 24        | 116                 |       |                 |
| 30        | 24        | 576                 | 344   | 230             |
| 28        | 48        | ND <sup>a</sup>     |       |                 |
| 29        | 48        | 23.4                |       |                 |
| 30        | 48        | ND <sup>a</sup>     | 23.4  | NA <sup>b</sup> |

Dosing cohorts consisted of three groups of drug naïve adult male CD-1 mice. Plasma Lower Limit of Quantitation (LLOQ) = 10.0 ng/ml. <sup>a</sup> ND: No data; <sup>b</sup> NA: Not applicable

## Supplemental Reference

1. Cioffi CL, R. B., Freeman EE, Conlon MP, Chen P, Stafford DG, Schwarz DM, Zhu L, Kitchen DB, Barnes KD, Dobri N, Michelotti E, Cywin CL, Martin WH, Pearson PG, Johnson G, Petrukhin K. . (2015) Bicyclic [3.3.0]-Octahydrocyclopenta[c]pyrrolo Antagonists of Retinol Binding Protein 4: Potential Treatment of Atrophic Age-Related Macular Degeneration and Stargardt Disease. *J Med Chem* **58**, 5863–5888
